# Supplementary material for: Ten quick tips for effective dimensionality reduction
Source: PLoS Comput Biol. 2019 Jun 20;15(6):e1006907. doi: 10.1371/journal.pcbi.1006907 (PMC6586259; doi:10.1371/journal.pcbi.1006907)
Supplement: S1 Code — (RMD) [file pcbi.1006907.s001.Rmd]

---
title: "Ten quick tips for dimensionality reduction: figures for the paper"
author: Lan Huong Nguyen
output: 
  BiocStyle::pdf_document:
    toc: yes
---


```{r style, echo=FALSE, message=FALSE, warning=FALSE, results="asis"}
library("BiocStyle")
library("rmarkdown")
options(width = 200, stringsAsFactors = FALSE) 
knitr::opts_chunk$set(
  message = FALSE, error = FALSE, warning = FALSE, 
  fig.path = "../figs/", 
  dev=c("png", "pdf")) 
```

In this document we provide code to generate all figures included in  the paper.
Most of plots are generated using the 
[`factoextra`](https://CRAN.R-project.org/package=factoextra) package
by Kassambara and Mundt.

```{r setup}
library(factoextra)
library(lattice)
library(tidyverse)
library(gridExtra)
library(viridis)
theme_set(theme_minimal())
theme_update(
  text = element_text(size = 20)
)
```

# Scree plot

Below we generate 5-dimensional data and projected onto 500-dimensional space
using multiplication by an orthogonal matrix.

```{r}
set.seed(4756)
n <- 1000
d <- 5
p <- 500
sigma <- 1
R1 <- matrix(rnorm(n*d), nrow = n)
R2 <- matrix(rnorm(p*d), nrow = p)
U <- qr.Q(qr(R1))
V <- qr.Q(qr(R2))
sv <- sqrt(n)*c(1.8, 2.1, 2.5, 3.3, 4)
X <- U %*% diag(sv) %*% t(V)
Y <- X + matrix(rnorm(n*p, sd = sigma), ncol = p) 

# Compute PCA
pca.res <- prcomp(Y, scale. = FALSE)
```

A scree plot shows percentage of variance explained by consecutive principal 
components (Fig.1). Percentage of variance explained is equal to the 
normalized eigenvalues of the covariance matrix used in PCA.

```{r}
var_explained <- 100*(pca.res$sdev^2)/sum(pca.res$sdev^2)
var_explained[1:10]
```


```{r scree}
fviz_eig(pca.res) + ggtitle("") +
  theme(text = element_text(size = 20))
```

You can also inspect the histogram of the eigenvalues and the fitted
Marchenko-Pastur distribution. The eigenvalues to the right of the 
fitted curve correspond to the signal, i.e. are larger than the eigenvalues
expected if data (with the same dimensionality) was pure noise.

```{r mp-dist}
library(RMTstat)
df <- data.frame(sv = pca.res$sdev, eig = pca.res$sdev^2)
mp <- data.frame(eig = seq(0, max(df$eig), length.out = 100)) %>%  
  mutate(mp = dmp(eig, svr = n/p, var = sigma^2))  
ggplot(df, aes(x = eig)) +
  geom_histogram(
    bins = 80, fill = "grey30", color = "white", lwd =  0.2,
    aes(y = ..density..)) + 
  geom_line(data = mp, aes(y = mp-0.01), color = "royalblue", lwd = 1) 
```


# Aspect Ratio


We generate data from 2 Gaussian 2D clusters. We delete some observations
around x-axis (pretend they are missing). Then, we project the observations
to 50 dimensions (pretend we observed high-dimensional data).


```{r}
set.seed(834759)
N <- 500
X <- cbind(
  x1 = c(rnorm(N, mean = 0, sd = 4.5),
         rnorm(N, mean = 20, sd = 4.5)),
  y = c(rnorm(N, mean = 0, sd = 1),
         rnorm(N, mean = 0, sd = 1))
) 

class <-  rep(c("A", "B"), each  = N)

thresh <- 0.2
class <- class[abs(X[, 2]) > thresh]
X <- X[abs(X[, 2]) > thresh, ]

n <- nrow(X)
p <- 50
tmp <- matrix(rnorm(n*n, mean = 0, sd = 1), ncol = n)
tmp.qr <- qr(tmp) 
Q <- qr.Q(tmp.qr, complete=TRUE) 
Q <- Q[, 1:p]

Y <- X %*% Q[1:2, ] 
pca.res <- prcomp(Y, scale = TRUE)
```


The original 2 dimensional clusters have different variances along the X1 and X2 
axis (more variability along the first axis). Some data are missing around
x-axis, but the red and blue clusters are still relatively well separated.

```{r orig-data, fig.height=5}
df <- data.frame(X, class)
colnames(df) <- c("x", "y","label")
ggplot(df, aes(x = x, y = y, color = label)) +
  geom_point(size = 1) + coord_fixed() +
  scale_color_brewer(name = "Group", palette = "Set1") +
  theme_minimal()
```

Plots below are included in Fig. 2.

We compute the observed 50D data to the first 2 PCs, but here we use
an arbitrary aspect ratio producing an (incorrect) rectangular plot.


```{r arbitrary-pca, fig.width=5, fig.height=8}
fviz_pca_ind(pca.res, geom = "point")  +
  ggtitle("") + coord_fixed(4) +
  theme(text = element_text(size = 30))
```


```{r arbitrary-pca-labels, fig.width=6, fig.height=8}
fviz_pca_ind(pca.res, geom = "point", col.ind = df$label, 
             pointsize = 2.5, invisible="quali") + coord_fixed(4) +
  scale_shape_manual(name = "Group", values = c(16, 16)) +
  scale_color_brewer(name = "Group", palette = "Set1") +
  ggtitle("") +
  theme(text = element_text(size = 30))
```

Similarly, one might produce a strictly square plot (set 
code chunk settings to equal height and with: `fig.width=8, fig.height=8`).
The following plot has still an incorrect aspect ratio.

```{r square-pca, fig.width=8, fig.height=8}
fviz_pca_ind(pca.res, geom = "point")  + xlim(NA, 15) +
  ggtitle("") + theme(text = element_text(size = 30))
```

```{r square-pca-labels,  fig.width=9, fig.height=8}
fviz_pca_ind(pca.res, geom = "point", col.ind = df$label, 
             pointsize = 2.5, invisible="quali") +
  scale_shape_manual(name = "Group", values = c(16, 16)) +
  scale_color_brewer(name = "Group", palette = "Set1") +
  ggtitle("") + xlim(NA, 15) +
  theme(text = element_text(size = 30))
```


A correct ratio, is the one that reflects the ration between the variance
explained by each axis. This can be done by adding `+ coord_fixed(1)` to a
ggplot object.

```{r ratio-pca, fig.width=8, fig.height=5}
fviz_pca_ind(pca.res, geom = "point") + coord_fixed() +
  ggtitle("") + xlim(NA, 15) +
  theme(text = element_text(size = 30))
```


```{r ratio-pca-labels, fig.width=9, fig.height=5}
fviz_pca_ind(pca.res, geom = "point", col.ind = df$label, pointsize = 2.5,
             invisible="quali") +
  scale_shape_manual(name = "Group", values = c(16, 16)) +
  scale_color_brewer(name = "Group", palette = "Set1") +
  coord_fixed() +  ggtitle("") +
  theme(text = element_text(size = 30))
```


# External Information

Here, we use the wine dataset as example. The variables include the chemical
properties and composition of the wines. Wine class labels for grape varieties 
(59 Barolo, 71 Grignolino, 48 Barbera) are also available.

```{r, warning=FALSE, message=FALSE}
url <- "https://archive.ics.uci.edu/ml/machine-learning-databases/wine/wine.data"
wine <- read_csv(url, col_names = FALSE)
colnames(wine) <- c("class", "Alcohol", "MalicAcid", "Ash", "AlcAsh", "Mg", 
                    "Phenols", "Flav", "NonFlavPhenols", "Proa", "Color",
                    "Hue", "OD", "Proline")          
head(wine)
# OD variable is = OD280/OD315 of diluted wines
```


```{r}
# note that Nebbiolo is a grape variety for Barolo
wine.class <- factor(
    wine$class, 
    levels = c(1, 2, 3),
    labels = c("Nebbiolo", "Grignolino", "Barbera")) 
wine <- wine[,-1]
table(wine.class)
```


Scree plot for wine data:
```{r}
winePCA <- prcomp(wine, scale = TRUE)
fviz_eig(winePCA)
```


Correlation circle, feature projection plot, for Fig. 3 (a):

```{r cor-circle, fig.width=7, fig.height=7}
fviz_pca_var(winePCA, labelsize = 7) +
  ggtitle("") + theme(text = element_text(size = 25))
```

Contribution plot for Fig. 3(b)

```{r var-contrib, fig.width=8, fig.height=6}
fviz_contrib(winePCA, choice = "var", axes = 1) +
  ggtitle("") + theme(text = element_text(size = 25))
```


Sample projection plot:

```{r sample-pca-no-col}
#eig_ratio <- winePCA$eig[2]/winePCA$eig[1]
fviz_pca_ind(winePCA) + 
  coord_fixed() + theme(text = element_text(size = 25))
```


Biplot, Fig. 4.

```{r biplot,  fig.width=8, fig.height=8}
fviz_pca_biplot(pointsize = 2.5,
  winePCA, geom = "point", 
  labelsize = 8, col.var = "#c07d44") +
  coord_fixed() + ggtitle("") +
  ylim(-4.5, 4.5) + xlim(-5, 5) +
  theme(text = element_text(size = 25))
```


Sample plot with class memberships, Fig. 6(a):

```{r sample-pca,  fig.width=7, fig.height=7}
fviz_pca_ind(winePCA, col.ind = wine.class, pointsize = 2.5,
             ellipse.type = "convex", addEllipses = TRUE, labelsize = 6) + 
    scale_fill_brewer(name = "Grape variety", palette = "Set1") + 
    scale_color_brewer(name = "Grape variety", palette = "Set1") + 
    scale_shape_manual(name = "Grape variety", values = c(16, 16, 16)) +
    coord_fixed() +  ggtitle("") +  ylim(-4, 4) +
    guides(color = "none", fill = "none", shape = "none") +
    theme(text = element_text(size = 25))
```


Biplot with sample group ellipsoids, Fig. 6(b)

```{r biplot-color, fig.width=9, fig.height=7}
fviz_pca_biplot(
  winePCA, geom = "point", 
  col.ind = wine.class, 
  col.var = "#c07d44", pointsize = 2.5, labelsize = 7,
  addEllipses = TRUE, ellipse.level = 0.7) +
  coord_fixed() + ggtitle("") + ylim(-4, 4) +
  scale_fill_brewer(name = "Grape variety", palette = "Set1") + 
  scale_color_brewer(name = "Grape variety", palette = "Set1") + 
  scale_shape_manual(name = "Grape variety", values = c(16, 16, 16)) + 
  theme(text = element_text(size = 25))
```


# Latent structure

We generate five clusters of data points in 2D, and then project them to 10D. 


```{r cluster-means}
set.seed(98574) #7465
m <- 100
d <- 2
p <- 10
k <- 5
sigma <- 1
muMax <- 25
mu <- matrix(runif(k*d, max = muMax), ncol = d)

X <- lapply(seq_len(k), function(i) {
  ix <- rep(1, m) %*% t(mu[i, ]) + matrix(sigma*rnorm(m*d), ncol = d)
  return(ix)
})
names(X) <- paste0("Cluster", 1:k)
X.df <- plyr::ldply(X, function(x) x, .id = "Cluster")
X <- as.matrix(X.df[, -1])
#Q <- qr.Q(qr( matrix(rnorm(d*p), nrow = p)))
Y <- X  %*% matrix(rnorm(d*p), ncol = p)
```


```{r, cluster-pca-eigs}
pca.res <- prcomp(Y)
fviz_eig(pca.res)
```

The PCA plot shows clusters in Fig. 5(a).

```{r cluster-scores, fig.height=7}
fviz_pca_ind(pointsize = 2.5,
    pca.res, col.ind = X.df$Cluster, geom = "point") +
    guides(color=guide_legend(title="Membership"),
           shape=guide_legend(title="Membership")) +
    coord_fixed() + 
  ggtitle("") + theme(text = element_text(size = 25))
```


Then, we simulate data generated from a smooth continuous gradient 
(modeled as a Gaussian Process Latent Variable Model).


```{r gp-kernel}
set.seed(7365) 
n <- 500
p <- 10
sigma <- 0.01
t <- sort(c(seq(0, 1, length.out = 100), runif(n-100)))
K <- exp(-as.matrix(dist(t))) + diag(rep(sigma, n))
Q <- qr.Q(qr(matrix(rnorm(n*n), ncol = n)))
E <- 0.05*matrix(rnorm(n*n), ncol = n)
X <- (K + E) %*% Q[, seq_len(p)]
```

The scree plot:

```{r gp-pca-eigs}
pca.res <- prcomp(X)
fviz_eig(pca.res)
```

Continuous gradients shows up as a horseshoe on a PCA plot, Fig. 5(b)

```{r gp-scores, fig.height=7}
fviz_pca_ind(pca.res, col.ind = t, geom = "point", pointsize = 2.5) +
  coord_fixed() +
  scale_color_viridis(name = "Depth") +
  ggtitle("") + theme(text = element_text(size = 25))
```


# Distatis

We generate synthetic data "as if coming from 5 separate data tables". 

```{r}
set.seed(123)
library(ade4)
n_copies <- 5
n <- 20
p <- 5
sigma <- 5
M <- matrix(rnorm(n*p, sd = sigma), nrow = n)
E.lst <- lapply(seq_len(n_copies), function(x) matrix(rnorm(n*p), nrow = n))
M.lst <- lapply(E.lst, function(E) {data.frame(M + E)})
# ktab <- ktab.list.df(M.lst)
# statis.res <- statis(ktab, scannf = FALSE, nf = 2)
```

Then, we compute 5 distance matrices:


```{r}
D.lst <- lapply(M.lst, function(x) as.matrix(dist(x)))
D.arr <- abind::abind(D.lst, along = 3)
distatis.res <- DistatisR::distatis(D.arr, nfact2keep = n)
df <- distatis.res$res4Splus$PartialF %>%
  reshape2::melt(varnames = c("SampleID", "FactorID", "TableID")) %>%
  spread(key = "FactorID", value = "value") %>%
  mutate(SampleID = factor(SampleID))
consensus.df <- data.frame(
  SampleID = factor(seq_len(nrow(distatis.res$res4Splus$F))),
  distatis.res$res4Splus$F, check.names = FALSE)
```

Fig. 7 shows DISTATIS results similar to what can be obtained for multi-table
data.

```{r distatis, fig.width=8, fig.height=8.5}
cols <- colorRampPalette(RColorBrewer::brewer.pal(9, "Set1"))(n)
ggplot(
  data = consensus.df,
  aes(x = `Factor 1`, y = `Factor 2`, fill = SampleID)) +
  coord_fixed() + xlab("Factor 1") + ylab("Factor 2") +
  geom_point(data = df %>%
                 mutate(TableID = factor(TableID)), 
             aes(color = SampleID, shape = TableID),
             alpha= 0.8, size  = 3) + 
  geom_point(color = "black", size = 5, pch = 23) +
  theme(legend.position = "bottom",
        text = element_text(size = 25)) +
  scale_color_manual(values = cols) +
  scale_fill_manual(values = cols) +
  theme(legend.direction = "horizontal") +
  theme(legend.position = "bottom") +
  theme(legend.box = "vertical") 
```

# Procrustes


Below we generate 20 observations from 2D Gaussian
distribution and then project them to 10D (modeling low-rank data
embedded in 10D). We then generate 200 bootstrap samples of the data  
(200 data subsets with replacement). For each bootstrap trials, we compute 
the PCA, and save the projections results. We align the results for each 
bootstrap trial to the original projection of the full dataset.


```{r}
set.seed(123)
n_copies <- 200
n <- 20
p <- 10
d <- 2
sigma <- 10

X0 <- matrix(rnorm(n*d, sd=sigma), ncol = d)
tmp <- matrix(rnorm(p*p, mean = 0, sd = sigma), ncol = p)
tmp.qr <- qr(tmp) 
Q <- qr.Q(tmp.qr, complete=TRUE) 
X0 <- X0 %*% t(Q[, seq_len(d)])

res0 <- prcomp(X0)
eigs <- res0$sdev^2/sum(res0$sdev^2)

Y0 <- res0$x[, seq_len(d)]
Y0.df <- data.frame(SampleID = seq_len(n), Y0)

Y.lst <- list()
for(i in seq_len(n_copies)) {
    idx <- unique(sort(sample(seq_len(n), n, replace = TRUE)))
    res <- prcomp(X0[idx, ])
    res.proc <- vegan::procrustes(Y0[idx, ], res$x[, seq_len(d)])
    Y.df <- data.frame(SampleID = idx, res.proc$Yrot) 
    Y.lst[[i]] <- Y.df
}
names(Y.lst) <- seq_len(n_copies)
Y.lst.df <- plyr::ldply(Y.lst, .fun = function(x) x, .id = "BootID")
table(Y.lst.df$SampleID)
```

Fig. 9(a) showing Procrustes results for 2D "replicated" data (projected to 10D).
Density contours are shown for the replicates of the data points.

```{r procrustes, fig.width=8, fig.height=7}
cols <- colorRampPalette(RColorBrewer::brewer.pal(9, "Set1"))(n)
ggplot(
  data = Y.lst.df %>%
      mutate(SampleID = factor(SampleID)),
  aes(x = X1, y = X2, color = SampleID)) +
  coord_fixed() + 
  geom_density2d(contour= TRUE) + 
  geom_point(alpha= 0.3) + 
  geom_point(
      data = Y0.df %>%
      mutate(SampleID = factor(SampleID)), 
      aes(fill = SampleID, x = PC1, y = PC2),
      color = "black", size = 5, pch = 23) +
  xlab(paste0("PC 1 [", round(100*eigs[1], 1), "%]")) + 
  ylab(paste0("PC 2 [", round(100*eigs[2], 1), "%]")) +
  theme(legend.position = "bottom", 
        text = element_text(size = 25)) +
  scale_color_manual(values = cols) +
  scale_fill_manual(values = cols) +
  xlim(-23, 23) + ylim(-15.5, 15.5)

  
```

We repeat the process but with 5D Gaussian clusters embedded in 10D.

```{r}
set.seed(1234)
n_copies <- 200
n <- 20
p <- 10
d <- 5
sigma <- 10

X0 <- matrix(rnorm(n*d, sd = sigma), ncol = d)
tmp <- matrix(rnorm(p*p, mean = 0, sd = sigma), ncol = p)
tmp.qr <- qr(tmp) 
Q <- qr.Q(tmp.qr, complete=TRUE) 
X0 <- X0 %*% t(Q[, seq_len(d)])

res0 <- prcomp(X0)
eigs <- res0$sdev^2/sum(res0$sdev^2)

Y0 <- res0$x[, seq_len(d)]
Y0.df <- data.frame(SampleID = seq_len(n), Y0)

Y.lst <- list()
for(i in seq_len(n_copies)) {
    idx <- unique(sort(sample(seq_len(n), n, replace = TRUE)))
    res <- prcomp(X0[idx, ])
    res.proc <- vegan::procrustes(Y0[idx, ], res$x[, seq_len(2)])
    Y.df <- data.frame(SampleID = idx, res.proc$Yrot) 
    Y.lst[[i]] <- Y.df
}
names(Y.lst) <- seq_len(n_copies)
Y.lst.df <- plyr::ldply(Y.lst, .fun = function(x) x, .id = "BootID")
table(Y.lst.df$SampleID)
```

Fig. 9(a) shows the density clusters for the 5D data to be larger, for this
dataset.


```{r procrustes-10D, fig.width=8, fig.height=7}
cols <- colorRampPalette(RColorBrewer::brewer.pal(9, "Set1"))(n)
ggplot(
  data = Y.lst.df %>%
      mutate(SampleID = factor(SampleID)),
  aes(x = X1, y = X2, color = SampleID)) +
  coord_fixed() + 
  geom_density2d(contour= TRUE) + 
  geom_point(alpha= 0.3) + 
  geom_point(
      data = Y0.df %>%
      mutate(SampleID = factor(SampleID)), 
      aes(fill = SampleID, x = PC1, y = PC2),
      color = "black", size = 5, pch = 23) +
  xlab(paste0("PC 1 [", round(100*eigs[1], 1), "%]")) + 
  ylab(paste0("PC 2 [", round(100*eigs[2], 1), "%]")) +
  theme(legend.position = "bottom", 
        text = element_text(size = 25)) +
  scale_color_manual(values = cols) +
  scale_fill_manual(values = cols) +
  xlim(-31, 31) + ylim(-28, 28)
  
```

# Eigenvalues instability


We simulate the data with very close eigenvalues:

```{r}
set.seed(4756)
n <- 100
p <- 10
R1 <- matrix(rnorm(n*p), nrow = n)
R2 <- matrix(rnorm(p*p), nrow = p)
U <- qr.Q(qr(R1))
V <- qr.Q(qr(R2))
eigs <- c(7, 5.3, 5.2, 5.1, 3.5, 3, 2.5, 2*runif(3))
X <- U %*% diag(eigs) %*% t(V)
```


Fig. 8 showing a scree plot with similar eigenvalues indicating unstable PCs.

```{r unstable-eigs, fig.width=8, fig.height=6}
pca.res <- prcomp(X)
fviz_eig(pca.res) +
  ggtitle("") +
  theme(text = element_text(size = 25))
```


```{r pca-unstable}
fviz_pca_ind(pca.res) +   theme(text = element_text(size = 25))
```


```{r unstable-eigs-perturbed, fig.width=8, fig.height=6}
sigma <- 0.1
E <- matrix(sigma*rnorm(n*p), ncol = p)
pca.res.perturbed <- prcomp(X + E)
fviz_eig(pca.res.perturbed) +
  theme(text = element_text(size = 25))
```

PCA results changed quite a bit with a small perturbation

```{r pca-unstable-perturbed}
fviz_pca_ind(pca.res.perturbed)
```


# Striking image


GP data

```{r}
set.seed(8567) 
n <- 100
p <- 3
sigma <- 0.01
t <- sort(runif(n))
D <- as.matrix(dist(t))
K <- exp(-2*(D^2)) + sigma*diag(n)
eigen.res <- eigen(K)
ev <- pmax(eigen.res$values, 0)
A <- eigen.res$vectors %*% diag(sqrt(ev))
Z <- matrix(rnorm(n*p), ncol = p)
M <- A %*% Z
M <- data.frame(
  x = MASS::mvrnorm(mu = rep(0, times = n), Sigma = K),
  y = MASS::mvrnorm(mu = rep(0, times = n), Sigma = K),
  z = MASS::mvrnorm(mu = rep(0, times = n), Sigma = K))

pca.res <- prcomp(M)

X <- data.frame(pca.res$x)
colnames(X)[1:3] <- c("x", "y", "z")
X$color <- t
```


```{r}
theme.novpadding <-
  list(layout.heights =
         list(top.padding = 0,
              main.key.padding = 0,
              key.axis.padding = 0,
              axis.xlab.padding = 0,
              xlab.key.padding = 0,
              key.sub.padding = 0,
              bottom.padding = 0),
       axis.line = list(col = 0),
       clip =list(panel="off"),
       layout.widths =
         list(left.padding = 0,
              key.ylab.padding = 0,
              ylab.axis.padding = 0,
              axis.key.padding = 0,
              right.padding = 0))

classic_theme <- theme_classic() +
    theme(
        axis.text.x = element_blank(),
        axis.ticks.x = element_blank(),
        axis.text.y = element_blank(),
        axis.ticks.y = element_blank())
```


```{r}
M$color <- t
p1 <- ggplot(X) +
  geom_point(aes(color, 0, color = color)) + #, pch = 21, size = 3, color = "white") +
  coord_fixed() + ylab("") + xlab("x") +
  classic_theme + theme(axis.line.y =element_blank()) +
  scale_color_viridis_c(guide = "none") +
  scale_fill_viridis_c(guide = "none") +
  theme(plot.margin = unit(c(0,0.5,0,0), "cm"))
p2 <- ggplot(X) +
    geom_point(aes(x, y, color = color)) +
    coord_fixed() + 
    scale_color_viridis_c(guide = "none") +
    classic_theme +
    theme(plot.margin = unit(c(0,0.5,0,0), "cm"))

p3 <- lattice::cloud( 
  z ~ x*y, M, pch = 19, 
  col.point=viridis(length(X$color))[order(X$color)],
  par.settings = theme.novpadding) 
```

```{r striking-image, fig.width=5.5, fig.height=5}
grid.arrange(p3, p2, p1, ncol = 2, 
             layout_matrix = cbind(c(1,1,1, 3), c(2, 2, 2, 3)),
             widths = c(0.5, 0.5),
             padding = unit(0.00, "line"))
```


```{r}
sessionInfo()
```
